# Supplementary material for: N-glycosylation–dependent regulation of hK2P17.1 currents
Source: PubMed Central journal article supplement — Mol Biol Cell. 2019 Jun 1;30(12):1425–36. doi: 10.1091/mbc.E18-10-0687 (PMC6724686; doi:10.1091/mbc.e18-10-0687), 2019-06-01
Supplement: mbc-30-1425-s001.pdf [file mbc-30-1425-s001.pdf]

# Supplemental Materials

*Molecular Biology of the Cell*

Wiedmann et al.

## Supplementary Materials for

### ***N*-glycosylation-dependent regulation of hK<sub>2p17.1</sub> currents**

Felix Wiedmann<sup>1,2,3</sup>, Daniel Schlund<sup>1</sup>, Niels Voigt<sup>4,5</sup>, Antonius Ratte<sup>1,2,3</sup>, Manuel Kraft<sup>1,2,3</sup>, Hugo A. Katus<sup>1,2,3</sup>, Constanze Schmidt<sup>1,2,3</sup>

<sup>1</sup>Department of Cardiology, University of Heidelberg, Heidelberg, Germany; <sup>2</sup>DZHK (German Center for Cardiovascular Research), partner site Heidelberg /Mannheim, University of Heidelberg, Germany; <sup>3</sup>HCR, Heidelberg Center for Heart Rhythm Disorders, University of Heidelberg, Heidelberg, Germany; <sup>4</sup>Institute of Pharmacology and Toxicology, University Medical Center Göttingen, Georg-August University Göttingen, Germany; <sup>5</sup>DZHK (German Center for Cardiovascular Research), partner site Göttingen, University Göttingen, Germany.

#### **Corresponding author:**

PD Dr. med. Constanze Schmidt, FESC

Department of Cardiology

Medical University Hospital Heidelberg

Im Neuenheimer Feld 410

D-69120 Heidelberg, Germany

Tel.: ++49 6221 568187

Fax: ++49 6221 56 5724

E-Mail: [Constanze.Schmidt@med.uni-heidelberg.de](mailto:Constanze.Schmidt@med.uni-heidelberg.de)

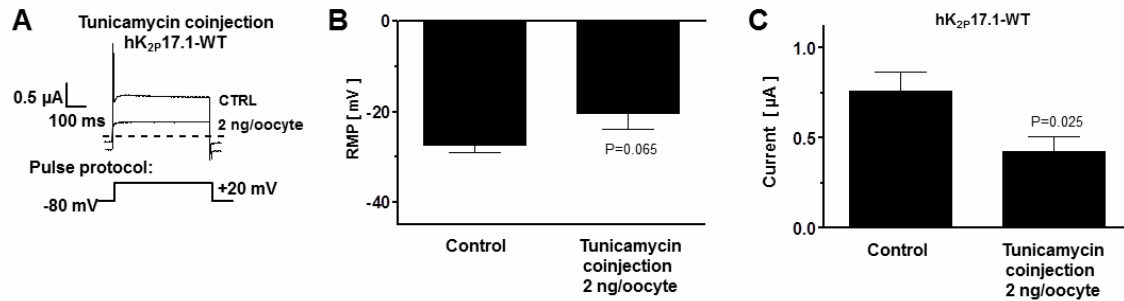

**Supplemental figure 1: Intracytoplasmic injection of tunicamycin reduces currents of hK<sub>2p</sub>17.1 channels, heterologously expressed in *Xenopus laevis* oocytes**

To probe whether the route of tunicamycin administration influences its effect on hK<sub>2p</sub>17.1 channels, tunicamycin was coinjected together with the cRNA and measurements were performed 48h after injection. (A) Representative current traces of *Xenopus* oocytes injected with hK<sub>2p</sub>17.1-WT cRNA and 2ng tunicamycin are compared to control cells (CTRL) injected with hK<sub>2p</sub>17.1-WT cRNA plus the vehicle DMSO. (B) Resting membrane potentials (RMP) of *Xenopus* oocytes after coinjection with tunicamycin showed a trend towards depolarization, compared to control cell. (C) After coinjection with tunicamycin hK<sub>2p</sub>17.1 currents were significantly diminished. Measurements were performed using the pulse protocol provided. Data are presented as mean ± SEM. P-values of two-tailed students t-tests are given as inserts. Dashed lines indicate 0 mV.

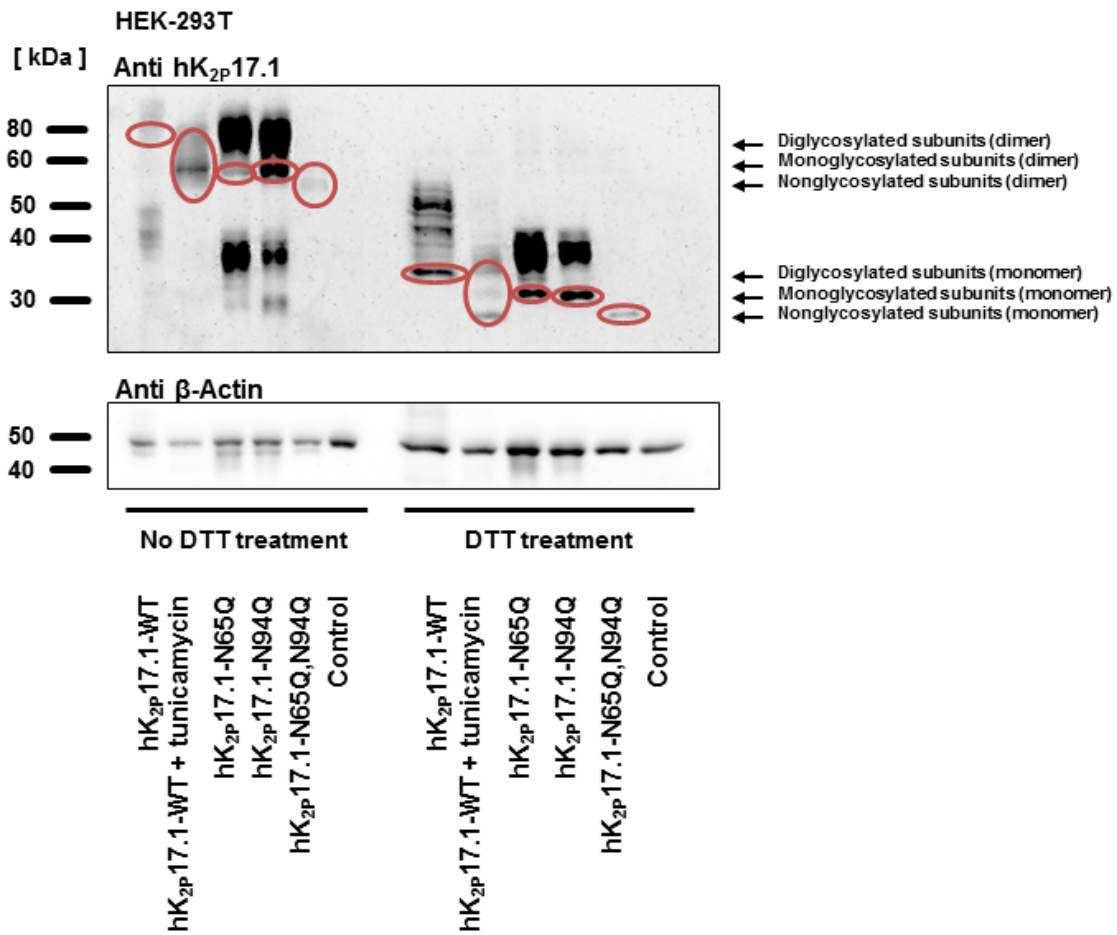

**Supplemental figure 2: Disruption of hK<sub>2p</sub>17.1 *N*-glycosylation by asparagine to glutamine mutagenesis does not prevent channel dimerization**

hK<sub>2p</sub>17.1-WT, hK<sub>2p</sub>17.1-N65Q, hK<sub>2p</sub>17.1-N94Q or hK<sub>2p</sub>17.1-N65Q,N94Q channel subunits were heterologously expressed in HEK-293T cells and subjected to SDS-PAGE either without (left) or with (right) DTT treatment. For the purpose of clear presentation specific bands are marked in red. Note that hK<sub>2p</sub>17.1-N65Q, hK<sub>2p</sub>17.1-N94Q and hK<sub>2p</sub>17.1-N65Q,N94Q mutant constructs can be detected as dimers, too. Non-transfected negative control experiments and samples of cells grown in the presence of the antibiotic *N*-glycosylation inhibitor tunicamycin (1 µg/ml) have been included as denoted.

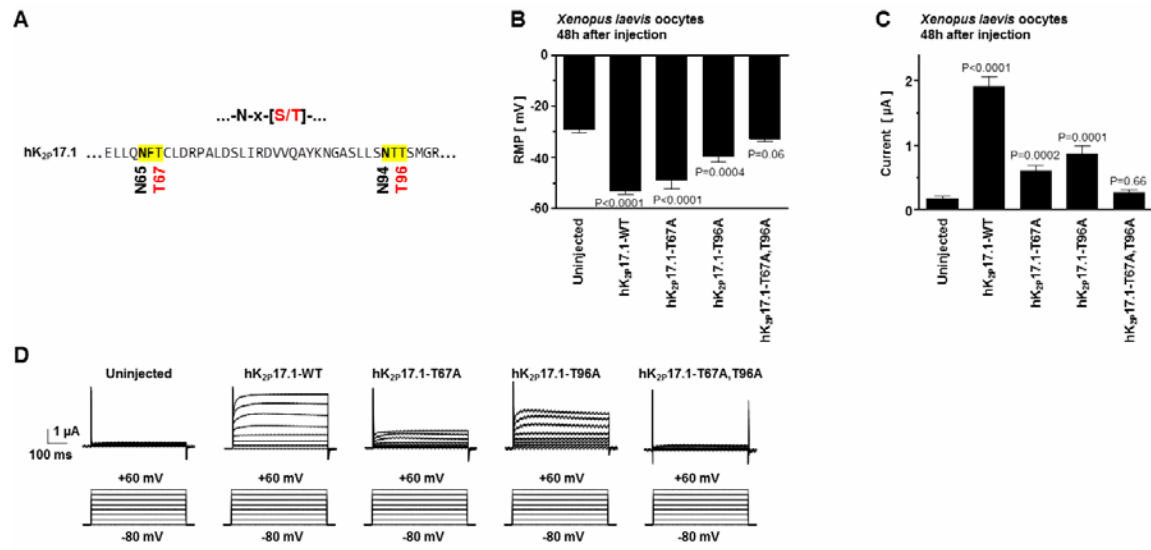

**Supplement figure 3: Disruption of hK<sub>2P</sub>17.1 N-glycosylation by alanine-mutagenesis of the N+2 amino acid of the N-glycosylation consensus motive**

(A) Amino acid (AA) sequence of hK<sub>2P</sub>17.1, threonine residues 67 and 96 as essential parts of the N-glycosylation consensus motives (N-x-[S/T], where x can be any AA except proline) around asparagine 65 and 94 are highlighted. (B) *Xenopus* oocytes expressing hK<sub>2P</sub>17.1-WT, hK<sub>2P</sub>17.1-T67A or hK<sub>2P</sub>17.1-T96A display resting membrane potential (RMP) hyperpolarization while expression of hK<sub>2P</sub>17.1-T67A,T96A double mutant constructs does not result in statistically significant changes of the RMP. (C) Single mutant channel subunits hK<sub>2P</sub>17.1-T67A and hK<sub>2P</sub>17.1-T96A give rise to outward potassium currents, when expressed in *Xenopus* oocytes. After injection of hK<sub>2P</sub>17.1-T67A,T96A cRNA potassium currents did not differ from uninjected oocytes. (D) Representative families of current traces, elicited by the pulse protocols depicted. All measurements were performed 48h after cRNA injection using the pulse protocol provided. Data are presented as mean ± SEM. P-values of two-tailed students t-tests vs. uninjected cells are given as inserts. Dashed lines indicate 0 mV.
